# Supplementary material
Source: Research Square preprint supplement (doi:10.21203/rs.3.rs-10153799/v1)
Supplement: Supplementary file 1 [file 0d3a1d1f4791cc83ec46a0c1.docx]

| **Characteristic** | **Size (n)** | **Percentage (%)** |
| --- | --- | --- |
| **Sex** |  |  |
| *Male* | 3446 | 50.5 |
| *Female* | 3378 | 49.5 |
| **Birth weight (g)** |  |  |
| *< 2,500* | 887 | 13 |
| *2,500 – 4,000* | 5459 | 80 |
| *> 4,000* | 478 | 7 |
| **Gestational age (weeks)** |  |  |
| *< 37* | 751 | 11 |
| *37 – 38* | 1433 | 21 |
| *39 – 40* | 4094 | 60 |
| *> 40* | 546 | 8 |

Table 1. **Demographic characteristics of BabyDetect study population.**
