# Supplementary material
Source: Research Square preprint supplement (doi:10.21203/rs.3.rs-10153799/v1)
Supplement: Supplementary file 2 [file 5d635a0cd2dbc549f443a672.docx]

| **ID** | **Sex** | **cDNA** | **Protein** | **BD CVD** | **ClinVar** | **Franklin** | **VarSome** | **PE-ref** | **Reclassification** | **Decision** |
| --- | --- | --- | --- | --- | --- | --- | --- | --- | --- | --- |
| 01- *MYH7* | Male | c.4075C>T | p.R1359C | VUS a | CI | LP | VUS | 1 | VUS | not reported |
| 02- *MYH7* | Male | c.4283T>C | p.L1428S | VUS a | VUS b | LP | VUS | 2 | VUS | not reported |
| 03- *MYH7* * 3 | Female | c.4498C>T | p.R1500W | P | P | P | P | 4 5 LO | P | reported |
| 04- *MYH7** 3 | Male | c.1750G>A | p.G584S | LP | P | P | P | 6 7 LO, VE | P | reported |
| 05- *MYH7* | Female | c.4817G>A | p.R1606H | VUS a | VUS | LP | LP | 8 | VUS | not reported |
| 06- *MYH7* | Female | c.2348G>A | p.R783H | VUS | CI | P | LP | NoEvidence | VUS | not reported |
| 07- *MYH7* | Female | c.2348G>A | p.R783H | VUS | CI | P | LP | NoEvidence | VUS | not reported |
| 08- *MYH7** 3 | Male | c.4498C>T | p.R1500W | P | P | P | P | 4 5 LO | P | reported |
| 09- *MYH7** 3 | Male | c.2572C>T | p.R858C | LP | LP | P | P | 9 LO | LP ** | reported |
| 010- *MYH7* | Male | c.4377G>T | p.K1459N | VUS | CI | VUS | LB | NoEvidence | VUS | not reported |
| 011- *MYH7* | female | c.3286G>T | p.D1096Y | VUS | CI | VUS | VUS | NoEvidence | VUS | not reported |
| 012- *MYH7* | male | c.4571A>G | p.H1524R | VUS | CI | VUS | VUS | NoEvidence | VUS | not reported |
| 013- *MYH7* | male | c.1370T>C | p.I457T | P *** | LP | P | P | 10 LO | P ** | not reported |
| 014- *MYH7* | female | c.1193G>A | p.G398E | VUS a | VUS | LP | P | NoEvidence | VUS | not reported |
| 015- *MYH7* | male | c.2334C>G | p.D778E | P *** | P | P | VUS | 11 LO | P ** | not reported |
| 016- *MYH7** 3 | male | c.1370T>C | p.I457T | P | LP | P | P | 10 LO | P | reported |
| 017- *MYH7* | male | c.2573G>A | p.R858H | LP *** | CI | P | LP | 12 LO, VE, P | LP ** | not reported |
| 018- *MYH7* | female | c.1325G>A | p.R442H | P *** | CI | P | LP | 13 LO | P ** | not reported |
| 019- *MYH7* | male | c.427C>T | p.R143W | P *** | P | P | P | 14 LO, VE | P ** | not reported |
| 020- *MYH7* | male | c.1231G>A | p.V411I | P *** | P | P | LP | 15 LO, VE | P ** | not reported |
| 021- *MYH7* | female | c.298G>A | p.A100T | VUS a | VUS | VUS | VUS | NoEvidence | VUS | not reported |
| 022- *MYH7* | male | c.4678C>T | p.R1560W | P *** | CI | P | P | 16 LO, VE | P ** | not reported |
| 023- *MYH7* | male | c.3645G>C | p.Q1215H | VUS | CI | VUS | VUS | NoEvidence | VUS | not reported |
| 024- *MYH7* | female | c.1370T>C | p.I457T | P *** | LP | P | P | 10, LO | P ** | not reported |
| 025- *MYH7* | male | c.3645G>C | p.Q1215H | VUS | CI | VUS | VUS | NoEvidence | VUS | not reported |

Table 4a. ***MYH7* gene variants from BabyDetect variant interpretation database.** The reference transcript for *MYH7* is NM_000257.4. For the reevaluation, ClinVar, Franklin and VarSome databases were accessed on 9 April 2026. Abbreviations are follows: BD CVD – BabyDetect Curated Variant Database; VUS – variant of uncertain significance; LP – likely pathogenic; P– pathogenic; CI – conflicting interpretation, LO – late onset; VE –variable expressivity; IP – incomplete penetrance; PE-ref –reference for pathogenicity evidence.

*– cases reported in Boemer et al 2025 3 ; ** – LP/P variants showing incomplete penetrance, variable expressivity or late-onset phenotypes remained unreported post-reclassification; *** – LP/ P variants identified after February 2024.

a – at the time of variant interpretation, the variant was classified as LP in our BD CVD and was filtered for the manual review. b – at the time of variant interpretation, the variant was classified as P/LP in ClinVar and was filtered for the manual review.

| **ID** | **Sex** | **cDNA** | **Protein** | **BD CVD** | **ClinVar** | **Franklin** | **VarSome** | **PE-ref** | **Reclassification** | **Decision** |
| --- | --- | --- | --- | --- | --- | --- | --- | --- | --- | --- |
| 01- *MYBPC3* | male | c.442G>A | p.G148R | LP | CI | P | LP | 17 18 , VE, IP | VUS | not reported |
| 02- *MYBPC3* | female | c.1591G>A | p.G531R | VUS | LP | P | LP | NoEvidence for AD | VUS | not reported |
| 03- *MYBPC3* | female | c.3373G>A | p.V1125M | VUS | CI | VUS | VUS | NoEvidence for AD | VUS | not reported |
| 04- *MYBPC3* * 3 | male | c.3407_3409delACT | p.Y1136del | LP | CI | LP | VUS | 19 20 18 VE | VUS | reported |
| 05- *MYBPC3* * 3 | female | c.2618C>T | p.P873L | LP | VUS | LP | VUS | 8 21 , VE | VUS | reported |
| 06- *MYBPC3* | male | c.1786G>A | p.G596R | VUS | CI | LP | VUS | 22 23 | VUS | not reported |
| 07- *MYBPC3* | female | c.2864_2865delCT | p.P955Rfs*95 | P *** | P | P | P | 24 , LO | P ** | not reported |
| 08- *MYBPC3* | male | c.2429G>A | p.R810H | P *** | CI | P | LP | 25 26, VE | P ** | not reported |
| 09- *MYBPC3* | male | c.3234G>A | p.W1078* | P *** | P | P | P | 27 , LO | P ** | not reported |
| 010- *MYBPC3* | female | c.3064C>T | p.R1022C | VUS | CI | P | LP | 12 | VUS | not reported |
| 011- *MYBPC3* | male | c.2534G>A | p.R845H | VUS | CI | VUS | VUS | 28 | VUS | not reported |
| 012- *MYBPC3* | male | c.2429G>A | p.R810H | P *** | CI | P | LP | 25 26, VE | P ** | not reported |

Table 4b. ***MYBPC3* gene variants from BabyDetect variant interpretation database.** The reference transcript for *MYBPC3* is NM_000256.3. ClinVar, Franklin and VarSome databases were accessed on 9 April 2026. Abbreviations are follows: BD CVD – BabyDetect Curated Variant Database; VUS – variant of uncertain significance; LP – likely pathogenic; P– pathogenic; CI – conflicting interpretation, LO – late onset; VE –variable expressivity; IP – incomplete penetrance; PE-ref –reference for pathogenicity evidence; AD– autosomal-dominant inheritance.

*– cases reported in Boemer et al 2025; ** - P variants associated with late-onset phenotypes remained unreported post-reclassification; *** – P variants identified after February 2024.

**References**

1. Hershberger, R. E. *et al.* Coding Sequence Mutations Identified in *MYH7, TNNT2, SCN5A, CSRP3, LBD3* , and *TCAP* from 313 Patients with Familial or Idiopathic Dilated Cardiomyopathy. *Clin. Transl. Sci.* **1**, 21–26 (2008).

2. Welcome to ClinGen. https://www.clinicalgenome.org/.

3. Boemer, F. *et al.* Population-based, first-tier genomic newborn screening in the maternity ward. *Nat. Med.* **31**, 1339–1350 (2025).

4. Forleo, C. *et al.* Targeted next-generation sequencing detects novel gene–phenotype associations and expands the mutational spectrum in cardiomyopathies. *PLOS ONE* **12**, e0181842 (2017).

5. Norton, N. *et al.* Evaluating Pathogenicity of Rare Variants From Dilated Cardiomyopathy in the Exome Era. *Circ. Cardiovasc. Genet.* **5**, 167–174 (2012).

6. Ho, C. Y. *et al.* Genotype and Lifetime Burden of Disease in Hypertrophic Cardiomyopathy: Insights From the Sarcomeric Human Cardiomyopathy Registry (SHaRe). *Circulation* **138**, 1387–1398 (2018).

7. De Frutos, F. *et al.* Natural History of MYH7-Related Dilated Cardiomyopathy. *J. Am. Coll. Cardiol.* **80**, 1447–1461 (2022).

8. Marsiglia, J. D. C. *et al.* Screening of MYH7, MYBPC3, and TNNT2 genes in Brazilian patients with hypertrophic cardiomyopathy. *Am. Heart J.* **166**, 775–782 (2013).

9. Walsh, R. *et al.* Reassessment of Mendelian gene pathogenicity using 7,855 cardiomyopathy cases and 60,706 reference samples. *Genet. Med.* **19**, 192–203 (2017).

10. Mamelona, J. *et al.* A novel missense mutation in the MYH7 gene causes an uncharacteristic phenotype of myosin storage myopathy: a case report. *BMC Med. Genet.* **20**, 78 (2019).

11. Havndrup, O. Outcome of clinical versus genetic family screening in hypertrophic cardiomyopathy with focus on cardiac β-myosin gene mutations. *Cardiovasc. Res.* **57**, 347–357 (2003).

12. Berge, K. E. & Leren, T. P. Genetics of hypertrophic cardiomyopathy in Norway. *Clin. Genet.* **86**, 355–360 (2014).

13. Kamisago, M., Schmitt, J. P., McNamara, D., Seidman, C. & Seidman, J. G. Sarcomere protein gene mutations and inherited heart disease: a beta-cardiac myosin heavy chain mutation causing endocardial fibroelastosis and heart failure. *Novartis Found. Symp.* **274**, 176–189; discussion 189-195, 272–276 (2006).

14. Hershkovitz, T. *et al.* Clinical diversity of *MYH7* ‐related cardiomyopathies: Insights into genotype–phenotype correlations. *Am. J. Med. Genet. A.* **179**, 365–372 (2019).

15. Viswanathan, S. K. *et al.* Hypertrophic cardiomyopathy clinical phenotype is independent of gene mutation and mutation dosage. *PloS One* **12**, e0187948 (2017).

16. Mazzarotto, F. *et al.* Reevaluating the Genetic Contribution of Monogenic Dilated Cardiomyopathy. *Circulation* **141**, 387–398 (2020).

17. Page, S. P. *et al.* Cardiac Myosin Binding Protein-C Mutations in Families With Hypertrophic Cardiomyopathy: Disease Expression in Relation to Age, Gender, and Long Term Outcome. *Circ. Cardiovasc. Genet.* **5**, 156–166 (2012).

18. Van Lint, F. H. M. *et al.* Large next-generation sequencing gene panels in genetic heart disease: yield of pathogenic variants and variants of unknown significance. *Neth. Heart J.* **27**, 304–309 (2019).

19. Sequeira, V. *et al.* Perturbed length-dependent activation in human hypertrophic cardiomyopathy with missense sarcomeric gene mutations. *Circ. Res.* **112**, 1491–1505 (2013).

20. Tudurachi, B.-S. *et al.* An Update on MYBPC3 Gene Mutation in Hypertrophic Cardiomyopathy. *Int. J. Mol. Sci.* **24**, 10510 (2023).

21. Probst, S. *et al.* Sarcomere Gene Mutations in Isolated Left Ventricular Noncompaction Cardiomyopathy Do Not Predict Clinical Phenotype. *Circ. Cardiovasc. Genet.* **4**, 367–374 (2011).

22. Arad, M. *et al.* Merits and pitfalls of genetic testing in a hypertrophic cardiomyopathy clinic. *Isr. Med. Assoc. J. IMAJ* **16**, 707–713 (2014).

23. Pearce, A. *et al.* Missense mutations in the central domains of cardiac myosin binding protein-C and their potential contribution to hypertrophic cardiomyopathy. *J. Biol. Chem.* **300**, 105511 (2024).

24. Jansen, M. *et al.* BIO FOr CARE: biomarkers of hypertrophic cardiomyopathy development and progression in carriers of Dutch founder truncating MYBPC3 variants—design and status. *Neth. Heart J.* **29**, 318–329 (2021).

25. Liu, X. *et al.* Screening Mutations of MYBPC3 in 114 Unrelated Patients with Hypertrophic Cardiomyopathy by Targeted Capture and Next-generation Sequencing. *Sci. Rep.* **5**, 11411 (2015).

26. Cecconi, M. *et al.* Targeted next-generation sequencing helps to decipher the genetic and phenotypic heterogeneity of hypertrophic cardiomyopathy. *Int. J. Mol. Med.* **38**, 1111–1124 (2016).

27. Calore, C. *et al.* A founder MYBPC3 mutation results in HCM with a high risk of sudden death after the fourth decade of life. *J. Med. Genet.* **52**, 338–347 (2015).

28. Bick, A. G. *et al.* Burden of rare sarcomere gene variants in the Framingham and Jackson Heart Study cohorts. *Am. J. Hum. Genet.* **91**, 513–519 (2012).
