# Supplementary material
Source: Research Square preprint supplement (doi:10.21203/rs.3.rs-10153799/v1)
Supplement: Supplementary file 3 [file bf35a2c3a3587a867a95fc01.docx]

| **VCase No** | **Disorder** | **Sex** | **Gene** | **Genotype** | **Conventional NBS** | **Conventional NBS result** | **Confirmatory result / Follow-up** | **BabyDetect classification** | **Early Check classification** | **Early Check Categorization of Molecular diagnoses** | **Treatment / Follow-up** |
| --- | --- | --- | --- | --- | --- | --- | --- | --- | --- | --- | --- |
| 1 | Alpha1-Antitrypsin deficiency | Male | *SERPINA1* | SERPINA1: c.863A>T / c.1096G>A | / | / | A1-Antitrypsin 0.47 g/L (RR 0.9-2.0), Phenotype SZ confirmed | True Positive | True positive- nonpenetrant | Definite molecular diagnosis | Preventive measures |
| 2 | Alpha1-Antitrypsin deficiency | Male | *SERPINA1* | SERPINA1: c.863A>T / c.1096G>A | / | / | A1-Antitrypsin 0.47 g/L (RR 0.9-2.0), Phenotype SZ confirmed. Mother: MS, A1AT 1.05 g/L. FFather: MZ A1AT 0.84 g/L | True Positive | True positive- nonpenetrant | Definite molecular diagnosis | Preventive measures |
| 3 | Biotinidase deficiency | Female | *BTD* | BTD : c.1270G>C / c.1308A>C | Positive | Biotinidase activity 31.5% (RR>47) | Confirmed by NGS and decreased Biotinidase activity on serum, under conventional NBS follow-up | True Positive | True positive- penetrant | Definite molecular diagnosis | Standard of care: Biotine administration |
| 4 | Biotinidase deficiency | Male | *BTD* | BTD : c.535G>A / c.1270G>C | Positive | Biotinidase activity 30.5% (RR>47) | Confirmed by NGS and decreased Biotinidase activity on serum, under conventional NBS follow-up | True Positive | True positive- penetrant | Definite molecular diagnosis | Standard of care: Biotine administration |
| 5 | Biotinidase deficiency | Male | *BTD* | BTD : c.1270G>C / c.1270G>C | Positive | Biotinidase activity 26.0% (RR>47) | Decreased Biotinidase activity on control DBS sample (29.4%), under conventional NBS follow-up | True Positive | True positive- penetrant | Definite molecular diagnosis | Standard of care: Biotine administration |
| 6 | Biotinidase deficiency | Male | *BTD* | BTD : c.1270G>C / c.1308A>C | Positive | Biotinidase activity 26.4% (RR>47) | Decreased Biotinidase activity on serum, under conventional NBS follow-up | True Positive | True positive- penetrant | Definite molecular diagnosis | Standard of care: Biotine administration |
| 7 | Cardiomyopathy, dilated 1S | Female | *MYH7* | MYH7 : c.4498C>T | / | / | Confirmed by Sanger sequencing, positive familial history | True Positive | True positive- penetrant | Definite molecular diagnosis | Surveillance |
| 8 | Cardiomyopathy, dilated 1S | Male | *MYH7* | MYH7 : c.1750G>A | / | / | Confirmed by Sanger sequencing | True Positive | True positive- penetrant | Definite molecular diagnosis | Surveillance |
| 9 | Cardiomyopathy, dilated 1S | Male | *MYH7* | MYH7 : c.4498C>T | / | / | Confirmed by Sanger sequencing | True Positive | True positive- penetrant | Definite molecular diagnosis | Surveillance |
| 10 | Cardiomyopathy, dilated 1S | Male | *MYH7* | MYH7 : c.2572C>T | / | / | Confirmed by Sanger sequencing | True Positive | True positive- penetrant | Definite molecular diagnosis | Surveillance |
| 11 | Cardiomyopathy, dilated 1S | Male | *MYH7* | MYH7 : c.1370T>C | / | / | Confirmed by Sanger sequencing | True Positive | True positive- penetrant | Definite molecular diagnosis | Surveillance |
| 12 | Cardiomyopathy, hypertrophic, 4 | Male | *MYBPC3* | MYBPC3 : c.3407_3409delACT | / | / | Confirmed by Sanger sequencing | True Positive | True positive- nonpenetrant | Definite molecular diagnosis | Preventive measures |
| 13 | Cardiomyopathy, hypertrophic, 4 | Female | *MYBPC3* | MYBPC3 : c.2618C>T | / | / | Confirmed by Sanger sequencing | True Positive | True positive- penetrant | Definite molecular diagnosis | Surveillance |
| 14 | Carnitine palmitoyltransferase 2 deficiency | Male | *CPT2* | CPT2 : c.1339C>T / c.1436A>T | Negative | Long-chain acylcarnitines within normal values | CPT2 activity: 2.6 nmol/min/mg protein (RR: 9-23) | True Positive | True positive- penetrant | Definite molecular diagnosis | Standard of care initiated at 5 months of age |
| 15 | Cystic fibrosis | Male | *CFTR* | CFTR: c.1521_1523delCTT / c.1521_1523delCTT | Positive | Positive IRT + CFTR analysis | Under conventional NBS follow-up | True Positive | True positive- penetrant | Definite molecular diagnosis | Standard of care |
| 16 | Cystic fibrosis | Male | *CFTR* | CFTR: c.1521_1523delCTT / c.1521_1523delCTT | Positive | Positive CFTR analysis | Under conventional NBS follow-up | True Positive | True positive- penetrant | Definite molecular diagnosis | Standard of care |
| 17 | Cystic fibrosis | Female | *CFTR* | CFTR: c.1521_1523delCTT / c.1521_1523delCTT | Positive | Positive IRT + CFTR analysis | Under conventional NBS follow-up | True Positive | True positive- penetrant | Definite molecular diagnosis | Standard of care |
| 18 | Cystic fibrosis | Female | *CFTR* | CFTR : c.1521_1523delCTT / c.2657+5G>A | Positive | Positive IRT + CFTR analysis | Under conventional NBS follow-up | True Positive | True positive- penetrant | Definite molecular diagnosis | Standard of care |
| 19 | Cystic fibrosis | Male | *CFTR* | CFTR : c.1865G>A / c.1865G>A | Negative | IRT = 31 µg/L (RR<59.8) | Neonate not referred | True Positive | True positive-lost of follow-up | Possible molecular diagnosis | NA |
| 20 | Familial exudative vitreoretinopathy (FEVR) | Female | *FZD4* | FZD4 : c.313A>G | / | / | Confirmed by Sanger sequencing. Initial fundoscopy performed; follow-up planned at 9 months of age | True Positive | True positive- penetrant | Definite molecular diagnosis | Surveillance |
| 21 | Familial exudative vitreoretinopathy (FEVR) | Female | *FZD4* | FZD4 : c.9G>A | / | / | Confirmed by Sanger sequencing, positive paternal familial history; Initial fundoscopy performed; follow-up planned at 9 months of age | True Positive | True positive- penetrant | Definite molecular diagnosis | Surveillance |
| 22 | Glucose-6-Phosphate Dehydrogenase Deficiency (G6PD) | Male | *G6PD* | G6PD : c.[292G>A;466A>G] | Positive | G6PD activity < 30% (RR≥30) | Reduced G6PD activity measured on red blood cells, under conventional NBS follow-up | True Positive | True positive- penetrant | Definite molecular diagnosis | Preventive measures |
| 23 | Glucose-6-Phosphate Dehydrogenase Deficiency (G6PD) | Male | *G6PD* | G6PD : c.[292G>A;466A>G] | Positive | G6PD activity < 30% (RR≥30) | Reduced G6PD activity measured on red blood cells, under conventional NBS follow-up | True Positive | True positive- penetrant | Definite molecular diagnosis | Preventive measures |
| 24 | Glucose-6-Phosphate Dehydrogenase Deficiency (G6PD) | Male | *G6PD* | G6PD : c.[292G>A;466A>G] | Positive | G6PD activity < 30% (RR≥30) | Reduced G6PD activity measured on red blood cells, under conventional NBS follow-up | True Positive | True positive- penetrant | Definite molecular diagnosis | Preventive measures |
| 25 | Glucose-6-Phosphate Dehydrogenase Deficiency (G6PD) | Male | *G6PD* | G6PD : c.[292G>A;466A>G] | Positive | G6PD activity < 30% (RR≥30) | Reduced G6PD activity measured on red blood cells, under conventional NBS follow-up | True Positive | True positive- penetrant | Definite molecular diagnosis | Preventive measures |
| 26 | Glucose-6-Phosphate Dehydrogenase Deficiency (G6PD) | Male | *G6PD* | G6PD : c.[292G>A;466A>G] | Positive | G6PD activity < 30% (RR≥30) | Reduced G6PD activity measured on red blood cells, under conventional NBS follow-up | True Positive | True positive- penetrant | Definite molecular diagnosis | Preventive measures |
| 27 | Glucose-6-Phosphate Dehydrogenase Deficiency (G6PD) | Male | *G6PD* | G6PD : c.[292G>A;466A>G] | Positive | G6PD activity < 30% (RR≥30) | Reduced G6PD activity measured on red blood cells, under conventional NBS follow-up | True Positive | True positive- penetrant | Definite molecular diagnosis | Preventive measures |
| 28 | Glucose-6-Phosphate Dehydrogenase Deficiency (G6PD) | Male | *G6PD* | G6PD : c.1450C>T | Positive | G6PD activity < 30% (RR≥30) | Reduced G6PD activity measured on red blood cells, under conventional NBS follow-up | True Positive | True positive- penetrant | Definite molecular diagnosis | Preventive measures |
| 29 | Glucose-6-Phosphate Dehydrogenase Deficiency (G6PD) | Male | *G6PD* | G6PD : c.[292G>A;466A>G] | Positive | G6PD activity < 30% (RR≥30) | Reduced G6PD activity measured on red blood cells, under conventional NBS follow-up | True Positive | True positive- penetrant | Definite molecular diagnosis | Preventive measures |
| 30 | Glucose-6-Phosphate Dehydrogenase Deficiency (G6PD) | Male | *G6PD* | G6PD : c.[292G>A;466A>G] | Positive | G6PD activity < 30% (RR≥30) | Reduced G6PD activity measured on red blood cells, under conventional NBS follow-up | True Positive | True positive- penetrant | Definite molecular diagnosis | Preventive measures |
| 31 | Glucose-6-Phosphate Dehydrogenase Deficiency (G6PD) | Male | *G6PD* | G6PD : c.[292G>A;466A>G] | Negative | G6PD activity > 30% (RR≥30) | Reduced G6PD activity measured on red blood cells, under conventional NBS follow-up | True Positive | True positive- penetrant | Definite molecular diagnosis | Preventive measures |
| 32 | Glucose-6-Phosphate Dehydrogenase Deficiency (G6PD) | Male | *G6PD* | G6PD : c.[292G>A;466A>G] | Negative | G6PD activity > 30% (RR≥30) | Reduced G6PD activity measured on red blood cells | True Positive | True positive- penetrant | Definite molecular diagnosis | Preventive measures |
| 33 | Glucose-6-Phosphate Dehydrogenase Deficiency (G6PD) | Male | *G6PD* | G6PD : c.[292G>A;466A>G] | Positive | G6PD activity < 30% (RR≥30) | Reduced G6PD activity measured on red blood cells, under conventional NBS follow-up | True Positive | True positive- penetrant | Definite molecular diagnosis | Preventive measures |
| 34 | Glucose-6-Phosphate Dehydrogenase Deficiency (G6PD) | Male | *G6PD* | G6PD : c.[292G>A;466A>G] | Negative | G6PD activity > 30% (RR≥30) | Reduced G6PD activity measured on red blood cells | True Positive | True positive- penetrant | Definite molecular diagnosis | Preventive measures |
| 35 | Glucose-6-Phosphate Dehydrogenase Deficiency (G6PD) | Male | *G6PD* | G6PD : c.[292G>A;466A>G] | Negative | G6PD activity > 30% (RR≥30) | Reduced G6PD activity measured on red blood cells, under conventional NBS follow-up | True Positive | True positive- penetrant | Definite molecular diagnosis | Preventive measures |
| 36 | Glucose-6-Phosphate Dehydrogenase Deficiency (G6PD) | Male | *G6PD* | G6PD : c.[292G>A;466A>G] | Positive | G6PD activity < 30% (RR≥30) | Reduced G6PD activity measured on red blood cells, under conventional NBS follow-up | True Positive | True positive- penetrant | Definite molecular diagnosis | Preventive measures |
| 37 | Glucose-6-Phosphate Dehydrogenase Deficiency (G6PD) | Male | *G6PD* | G6PD : c.[292G>A;466A>G] | Negative | G6PD activity > 30% (RR≥30) | Reduced G6PD activity measured on red blood cells, under conventional NBS follow-up | True Positive | True positive- penetrant | Definite molecular diagnosis | Preventive measures |
| 38 | Glucose-6-Phosphate Dehydrogenase Deficiency (G6PD) | Female | *G6PD* | G6PD : c.[292G>A;466A>G] / c.[292G>A;466A>G] | Negative | G6PD activity > 30% (RR≥30) | Reduced G6PD activity measured on red blood cells, under conventional NBS follow-up | True Positive | True positive- penetrant | Definite molecular diagnosis | Preventive measures |
| 39 | Glucose-6-Phosphate Dehydrogenase Deficiency (G6PD) | Male | *G6PD* | G6PD : c.[292G>A;466A>G] | Negative | G6PD activity > 30% (RR≥30) | Reduced G6PD activity measured on red blood cells | True Positive | True positive- penetrant | Definite molecular diagnosis | Preventive measures |
| 40 | Glucose-6-Phosphate Dehydrogenase Deficiency (G6PD) | Male | *G6PD* | G6PD : c.[292G>A;466A>G] | Positive | G6PD activity < 30% (RR≥30) | Reduced G6PD activity measured on red blood cells, under conventional NBS follow-up | True Positive | True positive- penetrant | Definite molecular diagnosis | Preventive measures |
| 41 | Glucose-6-Phosphate Dehydrogenase Deficiency (G6PD) | Male | *G6PD* | G6PD : c.494A>C | Positive | G6PD activity < 30% (RR≥30) | Reduced G6PD activity measured on red blood cells, under conventional NBS follow-up | True Positive | True positive- penetrant | Definite molecular diagnosis | Preventive measures |
| 42 | Glucose-6-Phosphate Dehydrogenase Deficiency (G6PD) | Male | *G6PD* | G6PD : c.[292G>A;466A>G] | Positive | G6PD activity < 30% (RR≥30) | Reduced G6PD activity measured on red blood cells, under conventional NBS follow-up | True Positive | True positive- penetrant | Definite molecular diagnosis | Preventive measures |
| 43 | Glucose-6-Phosphate Dehydrogenase Deficiency (G6PD) | Male | *G6PD* | G6PD : c.[292G>A;466A>G] | Positive | G6PD activity < 30% (RR≥30) | Reduced G6PD activity measured on red blood cells, under conventional NBS follow-up | True Positive | True positive- penetrant | Definite molecular diagnosis | Preventive measures |
| 44 | Glucose-6-Phosphate Dehydrogenase Deficiency (G6PD) | Female | *G6PD* | G6PD : c.[292G>A;466A>G] / c.[292G>A;466A>G] | Positive | G6PD activity < 30% (RR≥30) | Reduced G6PD activity measured on red blood cells, under conventional NBS follow-up | True Positive | True positive- penetrant | Definite molecular diagnosis | Preventive measures |
| 45 | Glucose-6-Phosphate Dehydrogenase Deficiency (G6PD) | Female | *G6PD* | G6PD : c.[292G>A;466A>G] / c.[292G>A;466A>G] | Positive | G6PD activity < 30% (RR≥30) | Reduced G6PD activity measured on red blood cells, under conventional NBS follow-up | True Positive | True positive- penetrant | Definite molecular diagnosis | Preventive measures |
| 46 | Glucose-6-Phosphate Dehydrogenase Deficiency (G6PD) | Female | *G6PD* | G6PD : c.[292G>A;466A>G] / c.[292G>A;466A>G] | Positive | G6PD activity < 30% (RR≥30) | Reduced G6PD activity measured on red blood cells, under conventional NBS follow-up | True Positive | True positive- penetrant | Definite molecular diagnosis | Preventive measures |
| 47 | Glucose-6-Phosphate Dehydrogenase Deficiency (G6PD) | Male | *G6PD* | G6PD : c.934G>C | Negative | G6PD activity > 30% (RR≥30) | Reduced G6PD activity measured on red blood cells | True Positive | True positive- penetrant | Definite molecular diagnosis | Preventive measures |
| 48 | Glucose-6-Phosphate Dehydrogenase Deficiency (G6PD) | Male | *G6PD* | G6PD : c.653C>T | Positive | G6PD activity < 30% (RR≥30) | Reduced G6PD activity measured on red blood cells, under conventional NBS follow-up | True Positive | True positive- penetrant | Definite molecular diagnosis | Preventive measures |
| 49 | Glucose-6-Phosphate Dehydrogenase Deficiency (G6PD) | Male | *G6PD* | G6PD : c.653C>T | Positive | G6PD activity < 30% (RR≥30) | Reduced G6PD activity measured on red blood cells, under conventional NBS follow-up | True Positive | True positive- penetrant | Definite molecular diagnosis | Preventive measures |
| 50 | Glucose-6-Phosphate Dehydrogenase Deficiency (G6PD) | Male | *G6PD* | G6PD : c.[292G>A;466A>G] | Positive | G6PD activity < 30% (RR≥30) | Reduced G6PD activity measured on red blood cells, under conventional NBS follow-up | True Positive | True positive- penetrant | Definite molecular diagnosis | Preventive measures |
| 51 | Glucose-6-Phosphate Dehydrogenase Deficiency (G6PD) | Male | *G6PD* | G6PD : c.[292G>A;466A>G] | Negative | G6PD activity > 30% (RR≥30) | Reduced G6PD activity measured on red blood cells | True Positive | True positive- penetrant | Definite molecular diagnosis | Preventive measures |
| 52 | Glucose-6-Phosphate Dehydrogenase Deficiency (G6PD) | Male | *G6PD* | G6PD : c.[292G>A;466A>G] | Positive | G6PD activity < 30% (RR≥30) | Reduced G6PD activity measured on red blood cells, under conventional NBS follow-up | True Positive | True positive- penetrant | Definite molecular diagnosis | Preventive measures |
| 53 | Glucose-6-Phosphate Dehydrogenase Deficiency (G6PD) | Female | *G6PD* | G6PD : c.653C>T / c.1093G>A | Positive | G6PD activity < 30% (RR≥30) | Reduced G6PD activity measured on red blood cells, under conventional NBS follow-up | True Positive | True positive- penetrant | Definite molecular diagnosis | Preventive measures |
| 54 | Glucose-6-Phosphate Dehydrogenase Deficiency (G6PD) | Male | *G6PD* | G6PD : c.[292G>A;466A>G] | Positive | G6PD activity < 30% (RR≥30) | Reduced G6PD activity measured on red blood cells, under conventional NBS follow-up | True Positive | True positive- penetrant | Definite molecular diagnosis | Preventive measures |
| 55 | Glucose-6-Phosphate Dehydrogenase Deficiency (G6PD) | Male | *G6PD* | G6PD : c.494A>C | Positive | G6PD activity < 30% (RR≥30) | Reduced G6PD activity measured on red blood cells, under conventional NBS follow-up | True Positive | True positive- penetrant | Definite molecular diagnosis | Preventive measures |
| 56 | Glucose-6-Phosphate Dehydrogenase Deficiency (G6PD) | Male | *G6PD* | G6PD : c.653C>T | Positive | G6PD activity < 30% (RR≥30) | Reduced G6PD activity measured on red blood cells, under conventional NBS follow-up | True Positive | True positive- penetrant | Definite molecular diagnosis | Preventive measures |
| 57 | Glucose-6-Phosphate Dehydrogenase Deficiency (G6PD) | Male | *G6PD* | G6PD : c.[292G>A;466A>G] | Positive | G6PD activity < 30% (RR≥30) | Reduced G6PD activity measured on red blood cells, under conventional NBS follow-up | True Positive | True positive- penetrant | Definite molecular diagnosis | Preventive measures |
| 58 | Glucose-6-Phosphate Dehydrogenase Deficiency (G6PD) | Male | *G6PD* | G6PD : c.[292G>A;466A>G] | Positive | G6PD activity < 30% (RR≥30) | Reduced G6PD activity measured on red blood cells, under conventional NBS follow-up | True Positive | True positive- penetrant | Definite molecular diagnosis | Preventive measures |
| 59 | Glucose-6-Phosphate Dehydrogenase Deficiency (G6PD) | Male | *G6PD* | G6PD : [c.1058T>C-c.466A>G] | Positive | G6PD activity < 30% (RR≥30) | Reduced G6PD activity measured on red blood cells, under conventional NBS follow-up | True Positive | True positive- penetrant | Definite molecular diagnosis | Preventive measures |
| 60 | Glucose-6-Phosphate Dehydrogenase Deficiency (G6PD) | Male | *G6PD* | G6PD : c.[292G>A;466A>G] | Negative | G6PD activity > 30% (RR≥30) | Reduced G6PD activity measured on red blood cells | True Positive | True positive- penetrant | Definite molecular diagnosis | Preventive measures |
| 61 | Glucose-6-Phosphate Dehydrogenase Deficiency (G6PD) | Male | *G6PD* | G6PD : c.[292G>A;466A>G] | Positive | G6PD activity < 30% (RR≥30) | Reduced G6PD activity measured on red blood cells, under conventional NBS follow-up | True Positive | True positive- penetrant | Definite molecular diagnosis | Preventive measures |
| 62 | Glucose-6-Phosphate Dehydrogenase Deficiency (G6PD) | Female | *G6PD* | G6PD : c.[292G>A;466A>G] / c.[292G>A;466A>G] | Positive | G6PD activity < 30% (RR≥30) | Reduced G6PD activity measured on red blood cells, under conventional NBS follow-up | True Positive | True positive- penetrant | Definite molecular diagnosis | Preventive measures |
| 63 | Glucose-6-Phosphate Dehydrogenase Deficiency (G6PD) | Male | *G6PD* | G6PD : c.[292G>A;466A>G] | Positive | G6PD activity < 30% (RR≥30) | Reduced G6PD activity measured on red blood cells, under conventional NBS follow-up | True Positive | True positive- penetrant | Definite molecular diagnosis | Preventive measures |
| 64 | Glucose-6-Phosphate Dehydrogenase Deficiency (G6PD) | Male | *G6PD* | G6PD : c.[292G>A;466A>G] | Positive | G6PD activity < 30% (RR≥30) | Reduced G6PD activity measured on red blood cells, under conventional NBS follow-up | True Positive | True positive- penetrant | Definite molecular diagnosis | Preventive measures |
| 65 | Glucose-6-Phosphate Dehydrogenase Deficiency (G6PD) | Male | *G6PD* | G6PD : c.[292G>A;466A>G] | Positive | G6PD activity < 30% (RR≥30) | Reduced G6PD activity measured on red blood cells, under conventional NBS follow-up | True Positive | True positive- penetrant | Definite molecular diagnosis | Preventive measures |
| 66 | Glucose-6-Phosphate Dehydrogenase Deficiency (G6PD) | Male | *G6PD* | G6PD : c.[292G>A;466A>G] | Positive | G6PD activity < 30% (RR≥30) | Reduced G6PD activity measured on red blood cells, under conventional NBS follow-up | True Positive | True positive- penetrant | Definite molecular diagnosis | Preventive measures |
| 67 | Glucose-6-Phosphate Dehydrogenase Deficiency (G6PD) | Male | *G6PD* | G6PD : c.[292G>A;466A>G] | Positive | G6PD activity < 30% (RR≥30) | Reduced G6PD activity measured on red blood cells, under conventional NBS follow-up | True Positive | True positive- penetrant | Definite molecular diagnosis | Preventive measures |
| 68 | Glucose-6-Phosphate Dehydrogenase Deficiency (G6PD) | Male | *G6PD* | G6PD : c.[292G>A;466A>G] | Positive | G6PD activity < 30% (RR≥30) | Reduced G6PD activity measured on red blood cells, under conventional NBS follow-up | True Positive | True positive- penetrant | Definite molecular diagnosis | Preventive measures |
| 69 | Glucose-6-Phosphate Dehydrogenase Deficiency (G6PD) | Female | *G6PD* | G6PD : c.[292G>A;466A>G] / c.[292G>A;466A>G] | Positive | G6PD activity < 30% (RR≥30) | Reduced G6PD activity measured on red blood cells, under conventional NBS follow-up | True Positive | True positive- penetrant | Definite molecular diagnosis | Preventive measures |
| 70 | Glucose-6-Phosphate Dehydrogenase Deficiency (G6PD) | Male | *G6PD* | G6PD : c.[466A>G;1058T>C] | Positive | G6PD activity < 30% (RR≥30) | Reduced G6PD activity measured on red blood cells, under conventional NBS follow-up | True Positive | True positive- penetrant | Definite molecular diagnosis | Preventive measures |
| 71 | Glucose-6-Phosphate Dehydrogenase Deficiency (G6PD) | Male | *G6PD* | G6PD : c.[292G>A;466A>G] | Positive | G6PD activity < 30% (RR≥30) | Reduced G6PD activity measured on red blood cells, under conventional NBS follow-up | True Positive | True positive- penetrant | Definite molecular diagnosis | Preventive measures |
| 72 | Glucose-6-Phosphate Dehydrogenase Deficiency (G6PD) | Male | *G6PD* | G6PD : c.[292G>A;466A>G] | Positive | G6PD activity < 30% (RR≥30) | Reduced G6PD activity measured on red blood cells, under conventional NBS follow-up | True Positive | True positive- penetrant | Definite molecular diagnosis | Preventive measures |
| 73 | Glucose-6-Phosphate Dehydrogenase Deficiency (G6PD) | Female | *G6PD* | G6PD : c.466A>G / c.466A>G | Positive | G6PD activity < 30% (RR≥30) | Reduced G6PD activity measured on red blood cells, under conventional NBS follow-up | True Positive | True positive- penetrant | Definite molecular diagnosis | Preventive measures |
| 74 | Glucose-6-Phosphate Dehydrogenase Deficiency (G6PD) | Male | *G6PD* | G6PD : c.[292G>A;c.466A>G] | Positive | G6PD activity < 30% (RR≥30) | Reduced G6PD activity measured on red blood cells, under conventional NBS follow-up | True Positive | True positive- penetrant | Definite molecular diagnosis | Preventive measures |
| 75 | Glucose-6-Phosphate Dehydrogenase Deficiency (G6PD) | Male | *G6PD* | G6PD : c.[292G>A;c.466A>G] | Positive | G6PD activity < 30% (RR≥30) | Reduced G6PD activity measured on red blood cells, under conventional NBS follow-up | True Positive | True positive- penetrant | Definite molecular diagnosis | Preventive measures |
| 76 | Glucose-6-Phosphate Dehydrogenase Deficiency (G6PD) | Male | *G6PD* | G6PD : c.1437G>C | Positive | G6PD activity < 30% (RR≥30) | Reduced G6PD activity measured on red blood cells, under conventional NBS follow-up | True Positive | True positive- penetrant | Definite molecular diagnosis | Preventive measures |
| 77 | Glucose-6-Phosphate Dehydrogenase Deficiency (G6PD) | Female | *G6PD* | G6PD : c.1058T>C / c.466A>G | Positive | G6PD activity < 30% (RR≥30) | Reduced G6PD activity measured on red blood cells, under conventional NBS follow-up | True Positive | True positive- penetrant | Definite molecular diagnosis | Preventive measures |
| 78 | Glucose-6-Phosphate Dehydrogenase Deficiency (G6PD) | Male | *G6PD* | G6PD : c.653C>T | Positive | G6PD activity < 30% (RR≥30) | Reduced G6PD activity measured on red blood cells, under conventional NBS follow-up | True Positive | True positive- penetrant | Definite molecular diagnosis | Preventive measures |
| 79 | Glucose-6-Phosphate Dehydrogenase Deficiency (G6PD) | Male | *G6PD* | G6PD : c.[292G>A;466A>G] | Positive | G6PD activity < 30% (RR≥30) | Reduced G6PD activity measured on red blood cells, under conventional NBS follow-up | True Positive | True positive- penetrant | Definite molecular diagnosis | Preventive measures |
| 80 | Glucose-6-Phosphate Dehydrogenase Deficiency (G6PD) | Male | *G6PD* | G6PD : c.[292G>A;466A>G] | Positive | G6PD activity < 30% (RR≥30) | Reduced G6PD activity measured on red blood cells, under conventional NBS follow-up | True Positive | True positive- penetrant | Definite molecular diagnosis | Preventive measures |
| 81 | Glucose-6-Phosphate Dehydrogenase Deficiency (G6PD) | Female | *G6PD* | G6PD : c.292G>A / 466A>G | Positive | G6PD activity < 30% (RR≥30) | Reduced G6PD activity measured on red blood cells, under conventional NBS follow-up | True Positive | True positive- penetrant | Definite molecular diagnosis | Preventive measures |
| 82 | Glucose-6-Phosphate Dehydrogenase Deficiency (G6PD) | Male | *G6PD* | G6PD : c.[292G>A;466A>G] | Positive | G6PD activity < 30% (RR≥30) | Reduced G6PD activity measured on red blood cells, under conventional NBS follow-up | True Positive | True positive- penetrant | Definite molecular diagnosis | Preventive measures |
| 83 | Glucose-6-Phosphate Dehydrogenase Deficiency (G6PD) | Male | *G6PD* | G6PD : c.[292G>A;466A>G] | Positive | G6PD activity < 30% (RR≥30) | Reduced G6PD activity measured on red blood cells, under conventional NBS follow-up | True Positive | True positive- penetrant | Definite molecular diagnosis | Preventive measures |
| 84 | Glucose-6-Phosphate Dehydrogenase Deficiency (G6PD) | Male | *G6PD* | G6PD : c.[292G>A;466A>G] | Positive | G6PD activity < 30% (RR≥30) | Reduced G6PD activity measured on red blood cells, under conventional NBS follow-up | True Positive | True positive- penetrant | Definite molecular diagnosis | Preventive measures |
| 85 | Glucose-6-Phosphate Dehydrogenase Deficiency (G6PD) | Male | *G6PD* | G6PD : c.653C>T | Positive | G6PD activity < 30% (RR≥30) | Reduced G6PD activity measured on red blood cells, under conventional NBS follow-up | True Positive | True positive- penetrant | Definite molecular diagnosis | Preventive measures |
| 86 | Glucose-6-Phosphate Dehydrogenase Deficiency (G6PD) | Male | *G6PD* | G6PD : c.[292G>A;466A>G] | Positive | G6PD activity < 30% (RR≥30) | Reduced G6PD activity measured on red blood cells, under conventional NBS follow-up | True Positive | True positive- penetrant | Definite molecular diagnosis | Preventive measures |
| 87 | Glucose-6-Phosphate Dehydrogenase Deficiency (G6PD) | Male | *G6PD* | G6PD : c.653C>T | Positive | G6PD activity < 30% (RR≥30) | Reduced G6PD activity measured on red blood cells, under conventional NBS follow-up | True Positive | True positive- penetrant | Definite molecular diagnosis | Preventive measures |
| 88 | Glucose-6-Phosphate Dehydrogenase Deficiency (G6PD) | Male | *G6PD* | G6PD : c.[292G>A;466A>G] | Positive | G6PD activity < 30% (RR≥30) | Reduced G6PD activity measured on red blood cells, under conventional NBS follow-up | True Positive | True positive- penetrant | Definite molecular diagnosis | Preventive measures |
| 89 | Glucose-6-Phosphate Dehydrogenase Deficiency (G6PD) | Male | *G6PD* | G6PD : c.653C>T | Positive | G6PD activity < 30% (RR≥30) | Reduced G6PD activity measured on red blood cells, under conventional NBS follow-up | True Positive | True positive- penetrant | Definite molecular diagnosis | Preventive measures |
| 90 | Glucose-6-Phosphate Dehydrogenase Deficiency (G6PD) | Male | *G6PD* | G6PD : c.934G>C | Positive | G6PD activity < 30% (RR≥30) | Reduced G6PD activity measured on red blood cells, under conventional NBS follow-up | True Positive | True positive- penetrant | Definite molecular diagnosis | Preventive measures |
| 91 | Glucose-6-Phosphate Dehydrogenase Deficiency (G6PD) | Male | *G6PD* | G6PD : c.1039G>C | Negative | G6PD activity > 30% (RR≥30) | Reduced G6PD activity measured on red blood cells | True Positive | True positive- penetrant | Definite molecular diagnosis | Preventive measures |
| 92 | Glucose-6-Phosphate Dehydrogenase Deficiency (G6PD) | Male | *G6PD* | G6PD : c.[292G>A;466A>G] | Positive | G6PD activity < 30% (RR≥30) | Reduced G6PD activity measured on red blood cells, under conventional NBS follow-up | True Positive | True positive- penetrant | Definite molecular diagnosis | Preventive measures |
| 93 | Glucose-6-Phosphate Dehydrogenase Deficiency (G6PD) | Male | *G6PD* | G6PD : c.[292G>A;466A>G] | Positive | G6PD activity < 30% (RR≥30) | Reduced G6PD activity measured on red blood cells, under conventional NBS follow-up | True Positive | True positive- penetrant | Definite molecular diagnosis | Preventive measures |
| 94 | Glucose-6-Phosphate Dehydrogenase Deficiency (G6PD) | Male | *G6PD* | G6PD : c.934G>C | Negative | G6PD activity > 30% (RR≥30) | Reduced G6PD activity measured on red blood cells | True Positive | True positive- penetrant | Definite molecular diagnosis | Preventive measures |
| 95 | Glucose-6-Phosphate Dehydrogenase Deficiency (G6PD) | Male | *G6PD* | G6PD : c.934G>C | Negative | G6PD activity > 30% (RR≥30) | Reduced G6PD activity measured on red blood cells | True Positive | True positive- penetrant | Definite molecular diagnosis | Preventive measures |
| 96 | Glucose-6-Phosphate Dehydrogenase Deficiency (G6PD) | Female | *G6PD* | G6PD : c.466A>G / c.466A>G | Negative | G6PD activity > 30% (RR≥30) | Reduced G6PD activity measured on red blood cells | True Positive | True positive- penetrant | Definite molecular diagnosis | Preventive measures |
| 97 | Glucose-6-Phosphate Dehydrogenase Deficiency (G6PD) | Male | *G6PD* | G6PD : c.[292G>A;466A>G] | Positive | G6PD activity < 30% (RR≥30) | Reduced G6PD activity measured on red blood cells, under conventional NBS follow-up | True Positive | True positive- penetrant | Definite molecular diagnosis | Preventive measures |
| 98 | Glucose-6-Phosphate Dehydrogenase Deficiency (G6PD) | Male | *G6PD* | G6PD : c.[292G>A;466A>G] | Positive | G6PD activity < 30% (RR≥30) | Reduced G6PD activity measured on red blood cells, under conventional NBS follow-up | True Positive | True positive- penetrant | Definite molecular diagnosis | Preventive measures |
| 99 | Glucose-6-Phosphate Dehydrogenase Deficiency (G6PD) | Male | *G6PD* | G6PD : c.[292G>A;466A>G] | Positive | G6PD activity < 30% (RR≥30) | Reduced G6PD activity measured on red blood cells, under conventional NBS follow-up | True Positive | True positive- penetrant | Definite molecular diagnosis | Preventive measures |
| 100 | Glucose-6-Phosphate Dehydrogenase Deficiency (G6PD) | Male | *G6PD* | G6PD : c.[466A>G;1058T>C] | Positive | G6PD activity < 30% (RR≥30) | Reduced G6PD activity measured on red blood cells, under conventional NBS follow-up | True Positive | True positive- penetrant | Definite molecular diagnosis | Preventive measures |
| 101 | Glucose-6-Phosphate Dehydrogenase Deficiency (G6PD) | Male | *G6PD* | G6PD : c.[292G>A;466A>G] | Positive | G6PD activity < 30% (RR≥30) | Reduced G6PD activity measured on red blood cells, under conventional NBS follow-up | True Positive | True positive- penetrant | Definite molecular diagnosis | Preventive measures |
| 102 | Glucose-6-Phosphate Dehydrogenase Deficiency (G6PD) | Male | *G6PD* | G6PD : c.653C>T | Positive | G6PD activity < 30% (RR≥30) | Reduced G6PD activity measured on red blood cells, under conventional NBS follow-up | True Positive | True positive- penetrant | Definite molecular diagnosis | Preventive measures |
| 103 | Glucose-6-Phosphate Dehydrogenase Deficiency (G6PD) | Male | *G6PD* | G6PD : c.653C>T | Positive | G6PD activity < 30% (RR≥30) | Reduced G6PD activity measured on red blood cells, under conventional NBS follow-up | True Positive | True positive- penetrant | Definite molecular diagnosis | Preventive measures |
| 104 | Glucose-6-Phosphate Dehydrogenase Deficiency (G6PD) | Female | *G6PD* | G6PD : c.[292G>A;466A>G] | Positive | G6PD activity < 30% (RR≥30) | Reduced G6PD activity measured on red blood cells, under conventional NBS follow-up | True Positive | True positive- penetrant | Definite molecular diagnosis | Preventive measures |
| 105 | Glucose-6-Phosphate Dehydrogenase Deficiency (G6PD) | Male | *G6PD* | G6PD : c.[292G>A;466A>G] | Positive | G6PD activity < 30% (RR≥30) | Reduced G6PD activity measured on red blood cells, under conventional NBS follow-up | True Positive | True positive- penetrant | Definite molecular diagnosis | Preventive measures |
| 106 | Glucose-6-Phosphate Dehydrogenase Deficiency (G6PD) | Male | *G6PD* | G6PD : c.653C>T | Positive | G6PD activity < 30% (RR≥30) | Reduced G6PD activity measured on red blood cells, under conventional NBS follow-up | True Positive | True positive- penetrant | Definite molecular diagnosis | Preventive measures |
| 107 | Glucose-6-Phosphate Dehydrogenase Deficiency (G6PD) | Male | *G6PD* | G6PD : c.[292G>A;466A>G] | Positive | G6PD activity < 30% (RR≥30) | Reduced G6PD activity measured on red blood cells, under conventional NBS follow-up | True Positive | True positive- penetrant | Definite molecular diagnosis | Preventive measures |
| 108 | Glucose-6-Phosphate Dehydrogenase Deficiency (G6PD) | Male | *G6PD* | G6PD : c.844G>C | Negative | G6PD activity > 30% (RR≥30) | Reduced G6PD activity measured on red blood cells | True Positive | True positive- penetrant | Definite molecular diagnosis | Preventive measures |
| 109 | Glucose-6-Phosphate Dehydrogenase Deficiency (G6PD) | Male | *G6PD* | G6PD : c.[292G>A;466A>G] | Positive | G6PD activity < 30% (RR≥30) | Reduced G6PD activity measured on red blood cells, under conventional NBS follow-up | True Positive | True positive- penetrant | Definite molecular diagnosis | Preventive measures |
| 110 | Glucose-6-Phosphate Dehydrogenase Deficiency (G6PD) | Male | *G6PD* | G6PD : c.[292G>A;466A>G] | Negative | G6PD activity > 30% (RR≥30) | Reduced G6PD activity measured on red blood cells | True Positive | True positive- penetrant | Definite molecular diagnosis | Preventive measures |
| 111 | Glucose-6-Phosphate Dehydrogenase Deficiency (G6PD) | Male | *G6PD* | G6PD : c.563C>T | Positive | G6PD activity < 30% (RR≥30) | Reduced G6PD activity measured on red blood cells, under conventional NBS follow-up | True Positive | True positive- penetrant | Definite molecular diagnosis | Preventive measures |
| 112 | Glucose-6-Phosphate Dehydrogenase Deficiency (G6PD) | Male | *G6PD* | G6PD : c.[292G>A;466A>G] | Negative | G6PD activity > 30% (RR≥30) | Reduced G6PD activity measured on red blood cells | True Positive | True positive- penetrant | Definite molecular diagnosis | Preventive measures |
| 113 | Glucose-6-Phosphate Dehydrogenase Deficiency (G6PD) | Male | *G6PD* | G6PD : c.[292G>A;466A>G] | Positive | G6PD activity < 30% (RR≥30) | Reduced G6PD activity measured on red blood cells, under conventional NBS follow-up | True Positive | True positive- penetrant | Definite molecular diagnosis | Preventive measures |
| 114 | Glucose-6-Phosphate Dehydrogenase Deficiency (G6PD) | Male | *G6PD* | G6PD : c.[292G>A;466A>G] | Positive | G6PD activity < 30% (RR≥30) | Reduced G6PD activity measured on red blood cells, under conventional NBS follow-up | True Positive | True positive- penetrant | Definite molecular diagnosis | Preventive measures |
| 115 | Glucose-6-Phosphate Dehydrogenase Deficiency (G6PD) | Male | *G6PD* | G6PD : c.[292G>A;466A>G] | Positive | G6PD activity < 30% (RR≥30) | Reduced G6PD activity measured on red blood cells, under conventional NBS follow-up | True Positive | True positive- penetrant | Definite molecular diagnosis | Preventive measures |
| 116 | Glycogen storage disease 1b/c (GSD) | Female | *SLC37A4* | SLC37A4 : c.1015G>T / c.1015G>T | / | / | Increased 1,5-anhydroglucitol | True Positive | True positive- penetrant | Definite molecular diagnosis | Standard of care: restrictive diet; empaglifozin initiated at 8 months of age |
| 117 | Glycogen storage disease 1b/c (GSD) | Female | *SLC37A4* | SLC37A4 : c.1015G>T / c.1015G>T | / | / | Increased 1,5-anhydroglucitol | True Positive | True positive- penetrant | Definite molecular diagnosis | Standard of care: restrictive diet; empaglifozin initiated at 8 months of age |
| 118 | Hemophilia A | Male | *F8* | F8 : c.396A>C | / | / | Factor VIII: 48% (RR>50) | True Positive | True positive- penetrant | Definite molecular diagnosis | Preventive care in pre-operative settings |
| 119 | Hemophilia A | Male | *F8* | F8 : c.6089G>A | / | / | Factor VIII: 21% (RR>50) | True Positive | True positive- penetrant | Definite molecular diagnosis | Preventive care in pre-operative settings |
| 120 | Hemophilia B | Male | *F9* | F9 : c.1345C>T | / | / | Lost of follow-up | True Positive | True positive-lost of follow-up | Possible molecular diagnosis | NA |
| 121 | Hemophilia B | Male | *F9* | F9 : c.1024A>G | / | / | Confirmed by Sanger sequencing | True Positive | True positive- penetrant | Definite molecular diagnosis | Preventive measures |
| 122 | Hyperoxaluria 1 | Female | *AGXT* | AGXT: c.33dupC / c.332G>A | / | / | Not confirmed – Maternal origin of both mutations confirmed by Sanger sequencing. | False Positive | Allelic false positive | Possible molecular diagnosis | None : FP |
| 123 | Maturity-onset diabetes of the young 13 (MODY13) | Male | *KCNJ11* | KCNJ11 : c.902G>A | / | / | Confirmed by Sanger sequencing, positive familial history | True Positive | True positive- nonpenetrant | Definite molecular diagnosis | Surveillance |
| 124 | Methylenetetrahydrofolate reductase (MTHFR) deficiency | Female | *MTHFR* | MTHFR : c.323C>T / c.323C>T | Negative | / | Identified by WES + Homocysteine = 90 µmol/L, 5-MTHF in CSF = 19 µmol/L (RR >= 64) | False Negative | Allelic false negative | not confirmed / uncertain | NA |
| 125 | Phenylketonuria | Male | *PAH* | PAH : c.1222C>T / c.688G>A | Positive | Phenylalanine = 164 µmoL/L (RR < 120) | Confirmed by NGS, under conventional NBS follow-up | True Positive | True positive- penetrant | Definite molecular diagnosis | Standard of care: restrictive diet |
| 126 | Phenylketonuria | Male | *PAH* | PAH : c.1066-11G>A / c.728G>A | Positive | Phenylalanine = 1842 µM (RR < 120) | Increased Phenylalanine confirmed on independant sample | True Positive | True positive- penetrant | Definite molecular diagnosis | Standard of care |
| 127 | Progressive cholestatic liver disease | Female | *TJP2* | TJP2 : c.1030C>T / c.1030C>T | / | / | Identified by WES | False Negative | Allelic false negative | not confirmed / uncertain | NA |
| 128 | Short-chain acyl-CoA dehydrogenase deficiency (SCAD) | Female | *ACADS* | ACADS : c.596C>T / c.1147C>T | Negative | C4-carnitine = 0.06 µM (RR<0.08) | Not confirmed – false-positive BabyDetect result - Control DBS C4-Carnitine = 0.39 µmol/L (0.14-0.55). Urinary Ethylmalonic acid normal. | False Positive | Phenotypic false positive | Possible molecular diagnosis | NA |
| 129 | Shwachman-Diamond syndrome (SDS) | Male | *SBDS* | SBDS : c.258+2T>C / c.258+2T>C | / | / | Confirmed by Sanger sequencing | True Positive | True positive- penetrant | Definite molecular diagnosis | Surveillance |
| 130 | Sickle Cell Disease | Female | *HBB* | HBB : c.20A>T/ c.20A>T | Positive | FSC phenotype | Under conventional NBS follow-up | True Positive | True positive- penetrant | Definite molecular diagnosis | Standard of care |
| 131 | Sickle Cell Disease | Male | *HBB* | HBB : c.20A>T/ c.20A>T | Positive | FS phenotype | Under conventional NBS follow-up | True Positive | True positive- penetrant | Definite molecular diagnosis | Standard of care |
| 132 | Sickle Cell Disease | Female | *HBB* | HBB : c.20A>T/ c.20A>T | Positive | FS phenotype | Under conventional NBS follow-up | True Positive | True positive- penetrant | Definite molecular diagnosis | Standard of care |
| 133 | Tyrosinemia I | Male | *FAH* | FAH : c.554-1G>T / c.554-1G>T | Positive | Tyrosine 209 µmol/L (RR< 294), SUAC 5.6 µmol/L (RR < 0.7) | Increased SUAC (14.6 µmol/L) confirmed on independant sample | True Positive | True positive- penetrant | Definite molecular diagnosis | Baby deceased at 1.5 month of age |
| 134 | Very Long-Chain Acyl-CoA Dehydrogenase deficincy (VLCAD) | Male | *ACADVL* | ACADVL: c.325G>A / c.601_603delGAG | Positive | C14:1-Carnitine = 3,0 μM (0,0 - 0,6), C12:1-Carnitine = 0,6 μM (0,0 - 0,2) | Confirmed by Sanger Sequencing, and by in vitro mitochondrial beta-oxydation analysis | True Positive | True positive- nonpenetrant | Definite molecular diagnosis | Fasting avoidance |
| 135 | Wilson disease | Male | *ATP7B* | ATP7B: c.1877G>C / c.3207C>A | / | / | Confirmed by Sanger Sequencing | True Positive | True positive- penetrant | Definite molecular diagnosis | Zinc Acetate started at 4 months of age |
| 136 | Wilson disease | Female | *ATP7B* | ATP7B : c.3904-2A>G / c.3203A>G | / | / | Not confirmed – Paternal origin of both mutations confirmed by Sanger sequencing. | False Positive | Allelic false positive | Possible molecular diagnosis | NA |

Table 2. **Positive cases identified in the BabyDetect study.** Results are additionally categorized by the Early Check program classification (columns 10-11). Slash in columns 5-6 corresponds to ‘no biomarker available’; NA in column 12 corresponds to ‘not applicable’.
