# Supplementary material
Source: Research Square preprint supplement (doi:10.21203/rs.3.rs-10153799/v1)
Supplement: Supplementary file 4 [file cf5ff6c9ca285dfa7dd64e67.xlsx]

## Sheet: Clinically informative findings
	Table 3: Representative case examples and associated operational implications.
Clusters	Results	N newborns	Clinical relevance of the finding	Relationship to conventional NBS	Post-screening clinical follow-up and management	Clinical and implementation implications
Cluster 1	Glycogen storage disease 1b/c (homozygous SLC37A4 c.1015G>T/c.1015G>T)	2	Presymptomatic detection of a severe metabolic disorder with early childhood onset. In the absence of early diagnosis, glycogen storage disease type 1b/c typically manifests during infancy with hypoglycemia, hepatomegaly, neutropenia, recurrent infections and progressive risk of multisystem complications.	Genomic screening facilitated etiologic diagnosis at a presymptomatic stage, enabling early clinical management.	Early metabolic surveillance and treatment were initiated following diagnosis, including dietary management and subsequent empagliflozin therapy. At ~3 years of age, both children demonstrated age-appropriate growth and neurodevelopment and remained clinically stable.	This case underscores the capacity of population-scale gNBS to shift selected severe pediatric disorders from symptom-driven detection to proactive, presymptomatic care.
Cluster 2	Carnitine palmitoyltransferase 2 deficiency (compound heterozygous CPT2 c.1339C>T / c.1436A>T)	1	Genomic screening detected a clinically relevant fatty-acid oxidation disorder missed by conventional newborn screening.Subsequent viral-triggered rhabdomyolysis provided clinical confirmation of disease relevance.	False negative of conventional NBS.	Confirmatory metabolic and enzymatic testing established the diagnosis. Fasting-avoidance counseling and an emergency protocol were implemented, with subsequent optimization of nutritional management following rhabdomyolysis at 20 months.	This finding illustrates tthe ability of gNBS to identify clinically relevant risk not captured by biochemical screening and to enable anticipatory management before irreversible clinical events occur.
Cluster 3	Shwachman-Diamond syndrome (homozygous SBDS c.258+2T>C/ c.258+2T>C	1	The value of screening in this multisystem disorder resides not in immediate treatment initiation but in establishing early multidisciplinary surveillance and preventive care pathways before clinically significant complications emerge.	Not amenable to conventional NBS.	Diagnosis was confirmed at 3 months of age. Follow-up included nutritional support, pancreatic enzyme replacement, fat-soluble vitamin supplementation, infection preventive measures and hematologic monitoring.	This case underscores that the value of gNBS lies not only in enabling early treatment but also in establishing anticipatory care pathways designed to prevent or mitigate disease-related severe complications.
Cluster 4	Wilson disease (compound heterozygous ATP7B c.1877G>C / c.3207C>A)	1	Diagnosis was established before the onset of clinically overt hepatic, neurological or systemic disease expression, enabling treatment initiation during a clinically asymptomatic stage.	False negative of conventional NBS.	Diagnosis was confirmed at 2 months during the presymptomatic phase, despite mild biochemical hepatic cytolysis. Zinc acetate was initiated at 4 months, and the child remained asymptomatic with normal exchangeable copper levels at 16 months of follow-up.	This finding demonstrates how gNBS can shift diagnosis to the presymptomatic phase, enabling biochemical monitoring and treatment before the development of irreversible pathology.
Cluster 5	G6PD deficiency group	94	The most frequent finding in the cohort, this condition accounted for a substantial proportion of screen-positive results and had a major influence on the interpretation of diagnostic yield and population-level clinical utility.	Among BabyDetect-only true positives with negative conventional screening, 17 were mild G6PD forms.	Post-screening management focused on anticipatory counseling, including avoidance of oxidative medications and other precipitating exposures, with ongoing pediatric follow-up.	This group illustrates that high-frequency preventable-risk findings can generate population-level preventive value, while also substantially influencing apparent gNBS yield.
Cluster 6	Cystic fibrosis case with negative conventional screening (homozygous CFTR c.1865G>A/ c.1865G>A)	1	A CFTR-related disorder was identified through genomic screening despite the absence of a positive conventional newborn screening result.	False negative of conventional NBS.	The case was classified as possible true positive / lost to follow-up with possible molecular diagnosis. Confirmation would require standard cystic fibrosis diagnostic assessment.	This finding illustrates that gNBS can complement IRT/biochemical screening and detect cases outside conventional thresholds, highlighting the importance of complete follow-up for definitive clinical classification.
Cluster 7	Hyperoxaluria 1 and Wilson disease, allelic false positives (AGXT c.33dupC / c.332G>A; ATP7B c.3904-2A>G / c.3203A>G)	2	Two P/LP variants in recessive disease genes were initially compatible with a possible recessive molecular diagnosis, but parental segregation showed that both variants were inherited from the same unaffected parent.	Singleton short-read sequencing did not resolve the clinically decisive cis/trans configuration at screening level.	Confirmatory segregation analysis demonstrated cis allelic configuration in each case, excluding the biallelic genotype required for recessive disease. Variant classifications were unchanged, but the newborn-level results was revised accordingly.	These findings highlight a critical interpretive principle in gNBS: pathogenic variants do not necessarily constitute a pathogenic genotype. They also highlight phasing as a key interpretive challenge in singleton short-read gNBS.
Cluster 8	SCAD, phenotypic false positive (compound heterozygous ACADS c.596C>T / c.1147C>T)	1	A molecular screen-positive result was not supported by subsequent biochemical evaluation and did not correspond to a clinically confirmed disease state.	Confirmatory biochemical testing was within normal levels.	Follow-up biochemical investigations, including C4-carnitine and urinary ethylmalonic acid measurements, were within normal range. The finding was subsequently reclassified as a phenotypic false positive with possible molecular diagnosis. No disease-specific long-term follow-up was pursued.	This finding illustrates that gene/condition inclusion must consider clinical validity, biochemical expressivity and expected disease burden, not only molecular detectability.
Cluster 9	MTHFR deficiency and Progressive cholestatic liver disease, false negative cases (homozygous MTHFR c.323C>T/c.323C>T ; homozygous TJP2 c.1030C>T/ c.1030C>T)	2	Both causal variants were present in the raw sequencing data at the time of screening; however, limitations of knowledge-base–driven interpretation prevented their recognition because neither variant had been previously curated in external- or internal databases.	Conventional NBS was insufficient or negative for these cases.	Both children were later diagnosed clinically - diagnostically: TJP2 - after referral for jaundice, cholestasis and ichthyosis; MTHFR - after neurodevelopmental signs, insulin-requiring diabetes and confirmatory biochemical/enzymatic testing. Both variants were subsequently added to the internal curated variant database. MTHFR c.323C>T variant was published in ClinVar (variation ID: 4526406, acce…	These findings illustrate that the performance of gNBS extends beyond sequencing accuracy and is critically shaped by evolving variant knowledge, curation practices and reporting policies.
Cluster 10	Maturity-onset diabetes of the young 13-MODY13 (KCNJ11 c.902G>A)	1	This diagnosis highlights the challenges posed by conditions with variable penetrance and later-onset presentation, which fall outside the primary objectives of BabyDetect genomic NBS.	Not amenable to conventional NBS.	The infant was placed under pediatric surveillance. KCNJ11 gene was subsequently removed from the screening panel because the phenotypic spectrum associated with the gene, including MODY13, did not align with BabyDetect inclusion criteria, particularly the requirements for disease onset before 5 years of age.	This case highlights how systematic end-of-study review can refine gene-panel content when observed findings are inconsistent with predefined screening scope.
Cluster 11	Cardiomyopathy findings MYH7 and MYBPC3 (single heterozygous variants)	37 reviewed findings: 25 MYH7, 12 MYBPC3	These findings highlighted a distinction between technical detectability and clinical reportability, raising questions about whether predispositional cardiomyopathy variants align with the intended scope of newborn genomic screening.	Not conventional NBS disorder.	From February 2024 onward, single heterozygous pathogenic or likely pathogenic variants in MYH7 and MYBPC3 were excluded from routine review because they did not meet predefined criteria . These variants were nevertheless retained in the internal curation database to enable reassessment if future findings indicated a recessive disease genotype. At study completion, all identified MYH7 and MYBPC3 …	This finding represents a key implementation lesson from population-scale gNBS: reporting frameworks must operate not only at the level of genes and variants, but also incorporate inheritance pattern, penetrance, expected age of onset and newborn-period actionability. Under the original reporting strategy, 37 neonates would have received potentially reportable dominant cardiomyopathy findings, wh…
Cluster 12	Familial Exudative Vitreoretinopathy (FZD4 : c.313A>G and FZD4 : c.9G>A)	2	Diagnosis was established before the onset of clinical stage, the retina was still attached; enabled proactive, preventive interventions rather than rescue surgery; Infant with FZD4: c.313A>G: de novo variant, negative family history. Infant with FZD4: 9G>A: inherited variant, positive family history.	Not amenable to conventional NBS.	Sanger sequencing confirmed the finding and established the diagnosis. Initial fundoscopy was performed; follow-up was planned at 9 months of age; both children remain under ophthalmological monitoring.	This case underscores the clinical utility of gNBS in detecting diseases not known in the family prior to symptom onset, thereby enabling the establishment of tailored anticipatory care pathways to prevent or mitigate severe complications.
